# Supplementary material for: Evidence of Porcine Circovirus Type 2 (PCV2) Genetic Shift from PCV2b to PCV2d Genotype in Sardinia, Italy
Source: MDPI journal article supplement (doi:10.3390/v15112157), 2023-10-26
Supplement: s1 [file s1]

**Table S2.** List of PCV2 ORF2 sequences used to calculate the haplotype network (n=138), samples details and GenBank accession number.

| Haplotype in this study | Samples (n) | Host             | Country of origin | Year of collection | Genotype | GenBank Accession Number |
|-------------------------|-------------|------------------|-------------------|--------------------|----------|--------------------------|
| Hap_1                   | 1           | Wild boar        | Italy (Sardinia)  | 2021               | PCV2b    | OR19951                  |
| Hap_2                   | 3           | Wild boar        | Italy (Sardinia)  | 2021               | PCV2d    | OR19952                  |
|                         |             | Wild boar        | Italy (Sardinia)  | 2021               | PCV2d    | OR19953                  |
|                         |             | Wild boar        | Italy (Sardinia)  | 2021               | PCV2d    | OR19954                  |
| Hap_3                   | 1           | Wild boar        | Italy (Sardinia)  | 2021               | PCV2d    | OR19955                  |
| Hap_4                   | 4           | Wild boar        | Italy (Sardinia)  | 2021               | PCV2d    | OR19957                  |
|                         |             | Wild boar        | Italy (Sardinia)  | 2021               | PCV2d    | OR19958                  |
|                         |             | Wild boar        | Italy (Sardinia)  | 2021               | PCV2d    | OR19959                  |
|                         |             | Wild boar        | Italy (Sardinia)  | 2021               | PCV2d    | OR19960                  |
| Hap_5                   | 1           | Wild boar        | Italy (Sardinia)  | 2021               | PCV2d    | OR19961                  |
| Hap_6                   | 1           | Wild boar        | Italy (Sardinia)  | 2021               | PCV2d    | OR19962                  |
| Hap_7                   | 2           | Wild boar        | Italy (Sardinia)  | 2021               | PCV2d    | OR19963                  |
|                         |             | Wild boar        | Italy (Sardinia)  | 2021               | PCV2d    | OR19956                  |
| Hap_8                   | 4           | Wild boar        | Italy (Sardinia)  | 2021               | PCV2d    | OR19964                  |
|                         |             | Wild boar        | Italy (Sardinia)  | 2021               | PCV2d    | OR19965                  |
|                         |             | Wild boar        | Italy (Sardinia)  | 2021               | PCV2d    | OR19966                  |
|                         |             | Domestic pig     | China             | 2018               | PCV2d    | MK347409                 |
| Hap_9                   | 5           | Wild boar        | Italy (Sardinia)  | 2021               | PCV2d    | OR19967                  |
|                         |             | Domestic pig     | China             | 2019               | PCV2d    | MN258760                 |
|                         |             | Domestic pig     | China             | 2016               | PCV2d    | KY947560                 |
|                         |             | Domestic pig     | China             | 2013               | PCV2d    | KX960949                 |
|                         |             | Domestic pig     | China             | 2012               | PCV2d    | KC515010                 |
| Hap_10                  | 1           | Wild boar        | Italy (Sardinia)  | 2021               | PCV2d    | OR19968                  |
| Hap_11                  | 1           | Wild boar        | Italy (Sardinia)  | 2021               | PCV2d    | OR19969                  |
| Hap_12                  | 11          | Domestic pig     | China             | 2019               | PCV2d    | MN258762                 |
|                         |             | Domestic pig     | China             | 2018               | PCV2d    | MN170523                 |
|                         |             | Domestic pig     | USA               | 2016               | PCV2d    | MK504412                 |
|                         |             | Domestic pig     | China             | 2014               | PCV2d    | MH465477                 |
|                         |             | Domestic pig     | China             | 2017               | PCV2d    | MG732805                 |
|                         |             | Domestic pig     | Italy             | 2021               | PCV2d    | OL377503                 |
|                         |             | Domestic pig     | Italy             | 2020               | PCV2d    | OL377499                 |
|                         |             | Free ranging pi  | Italy (Sardinia)  | 2021               | PCV2d    | OR19944                  |
|                         |             | Free ranging pi  | Italy (Sardinia)  | 2021               | PCV2d    | OR19945                  |
|                         |             | Free ranging pi  | Italy (Sardinia)  | 2021               | PCV2d    | OR19947                  |
|                         |             | Wild boar        | Italy (Sardinia)  | 2021               | PCV2d    | OR19950                  |
| Hap_13                  | 1           | Wild boar        | Italy (Sardinia)  | 2022               | PCV2d    | OR19970                  |
| Hap_14                  | 1           | Wild boar        | Italy (Sardinia)  | 2022               | PCV2d    | OR19971                  |
| Hap_15                  | 2           | Wild boar        | Italy (Sardinia)  | 2022               | PCV2d    | OR19972                  |
|                         |             | Wild boar        | Italy (Sardinia)  | 2022               | PCV2d    | OR19973                  |
| Hap_16                  | 1           | Wild boar        | Italy (Sardinia)  | 2022               | PCV2d    | OR19974                  |
| Hap_17                  | 3           | Domestic pig     | Italy (Sardinia)  | 2021               | PCV2d    | OR19924                  |
|                         |             | Domestic pig     | Italy (Sardinia)  | 2021               | PCV2d    | OR19925                  |
|                         |             | Domestic pig     | Italy (Sardinia)  | 2021               | PCV2d    | OR19926                  |
| Hap_18                  | 5           | Domestic pig     | Italy (Sardinia)  | 2021               | PCV2d    | OR19927                  |
|                         |             | Domestic pig     | Italy (Sardinia)  | 2021               | PCV2d    | OR19928                  |
|                         |             | Domestic pig     | Italy (Sardinia)  | 2021               | PCV2d    | OR19929                  |
|                         |             | Domestic pig     | Italy (Sardinia)  | 2021               | PCV2d    | OR19930                  |
|                         |             | Domestic pig     | Italy (Sardinia)  | 2022               | PCV2d    | OR19934                  |
| Hap_19                  | 2           | Domestic pig     | Italy (Sardinia)  | 2022               | PCV2d    | OR19936                  |
|                         |             | Free ranging pig | Italy (Sardinia)  | 2022               | PCV2d    | OR19946                  |
| Hap_20                  | 6           | Domestic pig     | Italy (Sardinia)  | 2020               | PCV2d    | OR19922                  |
|                         |             | Domestic pig     | Italy (Sardinia)  | 2020               | PCV2d    | OR19931                  |

|        |    |                  |                  |      |       |          |
|--------|----|------------------|------------------|------|-------|----------|
|        |    | Domestic pig     | Italy (Sardinia) | 2020 | PCV2d | OR19932  |
|        |    | Domestic pig     | Italy (Sardinia) | 2020 | PCV2d | OR19932  |
|        |    | Domestic pig     | Italy (Sardinia) | 2020 | PCV2d | OR19935  |
|        |    | Domestic pig     | Italy (Sardinia) | 2020 | PCV2d | OR19937  |
| Hap_21 | 1  | Domestic pig     | Italy (Sardinia) | 2022 | PCV2d | OR19933  |
| Hap_22 | 2  | Domestic pig     | Italy (Sardinia) | 2022 | PCV2d | OR19939  |
|        |    | Domestic pig     | Italy (Sardinia) | 2022 | PCV2d | OR19940  |
| Hap_23 | 1  | Domestic pig     | Italy (Sardinia) | 2022 | PCV2d | OR19938  |
| Hap_24 | 3  | Domestic pig     | Italy (Sardinia) | 2023 | PCV2d | OR19941  |
|        |    | Domestic pig     | Italy (Sardinia) | 2023 | PCV2d | OR19942  |
|        |    | Domestic pig     | Italy (Sardinia) | 2023 | PCV2d | OR19943  |
| Hap_25 | 4  | Domestic pig     | Italy (Sardinia) | 2020 | PCV2d | OR19918  |
|        |    | Domestic pig     | Italy (Sardinia) | 2020 | PCV2d | OR19919  |
|        |    | Domestic pig     | Italy (Sardinia) | 2020 | PCV2d | OR19920  |
|        |    | Domestic pig     | Italy (Sardinia) | 2020 | PCV2d | OR19921  |
| Hap_26 | 3  | Domestic pig     | Canada           | 2021 | PCV2d | OL377680 |
|        |    | Free ranging pig | Italy (Sardinia) | 2022 | PCV2d | OR19948  |
|        |    | Free ranging pig | Italy (Sardinia) | 2022 | PCV2d | OR19949  |
| Hap_27 | 3  | Wild boar        | Italy (Sardinia) | 2011 | PCV2b | KR559719 |
|        |    | Wild boar        | Italy (Sardinia) | 2011 | PCV2b | KR559718 |
|        |    | Wild boar        | Italy (Sardinia) | 2011 | PCV2b | KR559717 |
| Hap_28 | 4  | Domestic pig     | Italy (Sardinia) | 2012 | PCV2d | KR559696 |
|        |    | Domestic pig     | Italy (Sardinia) | 2012 | PCV2d | KR559693 |
|        |    | Wild boar        | Italy (Sardinia) | 2011 | PCV2d | KR559711 |
|        |    | Wild boar        | Italy (Sardinia) | 2011 | PCV2d | KR559709 |
| Hap_29 | 3  | Wild boar        | Italy (Sardinia) | 2010 | PCV2b | KR559705 |
|        |    | Wild boar        | Italy (Sardinia) | 2010 | PCV2b | KR559703 |
|        |    | Wild boar        | Italy (Sardinia) | 2010 | PCV2b | KR559702 |
| Hap_30 | 3  | Domestic pig     | China            | 2011 | PCV2d | KX668491 |
|        |    | Domestic pig     | USA              | 2018 | PCV2d | OL377073 |
|        |    | Domestic pig     | India            | 2021 | PCV2d | MW790263 |
| Hap_31 | 2  | Domestic pig     | China            | 2011 | PCV2d | KC514974 |
|        |    | Domestic pig     | China            | 2011 | PCV2d | KC514968 |
| Hap_32 | 4  | Domestic pig     | Austria          | 2019 | PCV2d | OM460170 |
|        |    | Domestic pig     | Germany          | 2018 | PCV2d | OL377220 |
|        |    | Wild boar        | Italy            | 2021 | PCV2d | OM818370 |
|        |    | Wild boar        | Italy            | 2021 | PCV2d | OM818369 |
| Hap_33 | 4  | Domestic pig     | China            | 2014 | PCV2d | KU311030 |
|        |    | Domestic pig     | China            | 2018 | PCV2d | MT185093 |
|        |    | Domestic pig     | China            | 2018 | PCV2d | MT185086 |
|        |    | Domestic pig     | China            | 2017 | PCV2d | MT184959 |
| Hap_34 | 10 | Domestic pig     | China            | 2017 | PCV2d | MH920578 |
|        |    | Domestic pig     | China            | 2017 | PCV2d | MH920561 |
|        |    | Domestic pig     | Italy            | 2011 | PCV2d | KP231167 |
|        |    | Domestic pig     | Italy            | 2015 | PCV2d | MT068220 |
|        |    | Domestic pig     | Italy            | 2018 | PCV2d | MT068222 |
|        |    | Domestic pig     | Italy            | 2016 | PCV2d | MT068235 |
|        |    | Domestic pig     | Italy            | 2016 | PCV2d | MT068267 |
|        |    | Domestic pig     | Italy            | 2016 | PCV2d | MT068271 |
|        |    | Domestic pig     | Italy            | 2016 | PCV2d | MT068277 |
|        |    | Wild boar        | Italy            | 2017 | PCV2d | MT068283 |
| Hap_35 | 3  | Domestic pig     | China            | 2017 | PCV2d | MH211363 |
|        |    | Domestic pig     | China            | 2021 | PCV2d | OP263062 |
|        |    | Domestic pig     | China            | 2019 | PCV2d | OP263040 |
| Hap_36 | 4  | Domestic pig     | Italy            | 2021 | PCV2d | OL377504 |
|        |    | Domestic pig     | Italy            | 2019 | PCV2d | OL377259 |
|        |    | Domestic pig     | Italy            | 2012 | PCV2d | KP231162 |

|        |   |              |       |      |       |          |
|--------|---|--------------|-------|------|-------|----------|
|        |   | Domestic pig | Italy | 2012 | PCV2d | KP231117 |
| Hap_37 | 5 | Domestic pig | Italy | 2014 | PCV2d | MT068214 |
|        |   | Domestic pig | Italy | 2014 | PCV2d | MT068216 |
|        |   | Domestic pig | Italy | 2014 | PCV2d | MT068255 |
|        |   | Domestic pig | Italy | 2014 | PCV2d | KP231168 |
|        |   | Domestic pig | Italy | 2020 | PCV2d | OL377502 |
| Hap_38 | 3 | Domestic pig | Italy | 2011 | PCV2d | KP231171 |
|        |   | Domestic pig | Italy | 2011 | PCV2d | KP231170 |
|        |   | Domestic pig | Italy | 2011 | PCV2d | KP231169 |
| Hap_39 | 2 | Wild boar    | Italy | 2011 | PCV2b | KR559725 |
|        |   | Wild boar    | Italy | 2011 | PCV2b | KR559715 |
| Hap_40 | 2 | Domestic pig | Italy | 2012 | PCV2b | KR559692 |
|        |   | Wild boar    | Italy | 2011 | PCV2b | KR559721 |
| Hap_41 | 2 | Wild boar    | Italy | 2011 | PCV2b | KR559720 |
| Hap_41 |   | Wild boar    | Italy | 2010 | PCV2b | KR559704 |
| Hap_42 | 2 | Wild boar    | Italy | 2009 | PCV2b | KR559700 |
|        |   | Wild boar    | Italy | 2009 | PCV2b | KR559699 |
| Hap_43 | 2 | Domestic pig | Italy | 2012 | PCV2b | KR559691 |
|        |   | Domestic pig | Italy | 2012 | PCV2b | KR559690 |
| Hap_44 | 2 | Domestic pig | Italy | 2012 | PCV2d | KR559686 |
|        |   | Domestic pig | China | 2009 | PCV2d | KC249977 |
| Hap_45 | 2 | Domestic pig | China | 2014 | PCV2d | MN052981 |
|        |   | Domestic pig | China | 2017 | PCV2d | MK140471 |
| Hap_46 | 2 | Domestic pig | China | 2012 | PCV2d | KC753771 |
|        |   | Domestic pig | China | 2012 | PCV2d | JQ413808 |
| Hap_47 | 2 | Domestic pig | Italy | 2020 | PCV2d | OL377500 |
|        |   | Domestic pig | Italy | 2018 | PCV2d | MT068230 |
| Hap_48 | 2 | Domestic pig | Italy | 2017 | PCV2d | MT068247 |
|        |   | Domestic pig | Italy | 2016 | PCV2d | MT068273 |
