# Supplementary material for: Evidence of Porcine Circovirus Type 2 (PCV2) Genetic Shift from PCV2b to PCV2d Genotype in Sardinia, Italy
Source: MDPI journal article supplement (doi:10.3390/v15112157), 2023-10-26
Supplement: s1 [file s1]

**Table S1.** List of PCV2 strains sequenced in this study, source, geographical origin and GenBank accession number.  
(n=57)

| Strain   | Source         | Municipality        | Province     | GenBank<br>Accession Number |
|----------|----------------|---------------------|--------------|-----------------------------|
| 567      | Ln mesenteric  | San Gavino Monreale | Sud Sardegna | OR19918                     |
| 563      | Lung           | San Gavino Monreale | Sud Sardegna | OR19919                     |
| 462      | Ln mediastinal | San Gavino Monreale | Sud Sardegna | OR19920                     |
| 389      | Spleen         | San Gavino Monreale | Sud Sardegna | OR19921                     |
| 393      | Kidney         | San Gavino Monreale | Sud Sardegna | OR19922                     |
| 467      | Lung           | San Gavino Monreale | Sud Sardegna | OR19923                     |
| 77913    | Placenta       | Usellus             | Oristano     | OR19924                     |
| 77248-1  | Foetus brain   | Gonnosfanadiga      | Sud Sardegna | OR19925                     |
| 77248-2  | Placenta       | Gonnosfanadiga      | Sud Sardegna | OR19926                     |
| 69113-1  | Foetus spleen  | Sanluri             | Sud Sardegna | OR19927                     |
| 69113-2  | Foetus brain   | Sanluri             | Sud Sardegna | OR19928                     |
| 69113-3  | Foetus spleen  | Sanluri             | Sud Sardegna | OR19929                     |
| 69113-4  | Foetus brain   | Sanluri             | Sud Sardegna | OR19930                     |
| 52803    | Lung           | Villamassargia      | Sud Sardegna | OR19931                     |
| 63193-1  | Heart          | Orosei              | Nuoro        | OR19932                     |
| 63193-2  | Lung           | Orosei              | Nuoro        | OR19933                     |
| 71617    | Heart          | Talana              | Nuoro        | OR19934                     |
| 74248    | Foetus brain   | Pattada             | Sassari      | OR19935                     |
| 75675-1  | Foetus spleen  | Irgoli              | Nuoro        | OR19936                     |
| 75675-2  | Foetus spleen  | Irgoli              | Nuoro        | OR19937                     |
| 35114    | Serum          | Austis              | Nuoro        | OR19938                     |
| 37369    | Serum          | Berchidda           | Hap_22       | OR19939                     |
| 37203    | Serum          | Berchidda           | Hap_22       | OR19940                     |
| 15411-1  | Foetus spleen  | Sassari             | Hap_24       | OR19941                     |
| 15411-2  | Foetus spleen  | Sassari             | Hap_24       | OR19942                     |
| 15411-3  | Foetus brain   | Sassari             | Hap_24       | OR19943                     |
| 80282-3  | spleen         | Talana              | Nuoro        | OR19944                     |
| 80282-5  | spleen         | Talana              | Nuoro        | OR19945                     |
| 80282-7  | spleen         | Talana              | Nuoro        | OR19946                     |
| 80282-10 | spleen         | Talana              | Nuoro        | OR19947                     |
| 71738-1  | spleen         | Urzulei             | Nuoro        | OR19948                     |
| 71738-2  | spleen         | Urzulei             | Nuoro        | OR19949                     |
| 79969    | spleen         | Monti               | Sassari      | OR19950                     |
| 79971    | spleen         | Ittireddu           | Sassari      | OR19951                     |
| 79978-1  | spleen         | Nughedu San Nicolò  | Sassari      | OR19952                     |
| 79978-2  | spleen         | Nughedu San Nicolò  | Sassari      | OR19953                     |
| 79978-3  | spleen         | Nughedu San Nicolò  | Sassari      | OR19954                     |
| 80042    | spleen         | Bono                | Sassari      | OR19955                     |
| 80064    | spleen         | Bono                | Sassari      | OR19956                     |
| 80067-1  | spleen         | Benetutti           | Sassari      | OR19957                     |
| 80067-2  | spleen         | Benetutti           | Sassari      | OR19958                     |
| 80067-3  | spleen         | Benetutti           | Sassari      | OR19959                     |
| 80067-4  | spleen         | Benetutti           | Sassari      | OR19960                     |
| 80099    | spleen         | Benetutti           | Sassari      | OR19961                     |
| 80104    | spleen         | Alà dei Sardi       | Sassari      | OR19962                     |
| 80117-1  | spleen         | Bonorva             | Sassari      | OR19963                     |
| 80117-2  | spleen         | Bonorva             | Sassari      | OR19964                     |
| 80143-1  | spleen         | Illorai             | Sassari      | OR19965                     |
| 80143-4  | spleen         | Illorai             | Sassari      | OR19966                     |
| 80143-5  | spleen         | Illorai             | Sassari      | OR19967                     |
| 80133    | spleen         | Arzachena           | Sassari      | OR19968                     |
| 80140    | spleen         | Pattada             | Sassari      | OR19969                     |
| 63229-1  | spleen         | Pattada             | Sassari      | OR19970                     |
| 63229-2  | spleen         | Pattada             | Sassari      | OR19971                     |
| 63168-2  | spleen         | Oschiri             | Sassari      | OR19972                     |

|         |        |         |         |         |
|---------|--------|---------|---------|---------|
| 63168-4 | spleen | Oschiri | Sassari | OR19973 |
| 63388   | spleen | Tula    | Sassari | OR19974 |
