# Supplementary material for: Evidence of Porcine Circovirus Type 2 (PCV2) Genetic Shift from PCV2b to PCV2d Genotype in Sardinia, Italy
Source: MDPI journal article supplement (doi:10.3390/v15112157), 2023-10-26
Supplement: s1 [file s1]

|                         |                                                                                                      |     |     |     |     |     |     |     |     |     |
|-------------------------|------------------------------------------------------------------------------------------------------|-----|-----|-----|-----|-----|-----|-----|-----|-----|
|                         | 10                                                                                                   | 20  | 30  | 40  | 50  | 60  | 70  | 80  | 90  | 100 |
| EU450638 C6 PCV-2b      | ..... ..... ..... ..... ..... ..... ..... ..... ..... .....                                          |     |     |     |     |     |     |     |     |     |
| KP768478 3196-LE PCV-2b | MTYFRRRYRRRRHPRSHLGQILRRRPWLVPFRHRYRWRRKNGIFNTRLSTFGYTIKRTTVRTPSWAVDMMRFNINDFLPPGGGSNPRSVPFEEYIRIK   |     |     |     |     |     |     |     |     |     |
| KY806003 762454 PCV-2b  | ..... ..... ..... ..... ..... ..... ..... ..... ..... .....                                          |     |     |     |     |     |     |     |     |     |
| 79971                   | ..... ..... ..... ..... ..... ..... ..... ..... ..... .....                                          |     |     |     |     |     |     |     |     |     |
|                         | 110                                                                                                  | 120 | 130 | 140 | 150 | 160 | 170 | 180 | 190 | 200 |
| EU450638 C6 PCV-2b      | ..... ..... ..... ..... ..... ..... ..... ..... ..... .....                                          |     |     |     |     |     |     |     |     |     |
| KP768478 3196-LE PCV-2b | VKVEFWPCSPITQGDGSGSSAVILDDNFVTKATALTYDPYVNYSSRRITITQPFSSYHSRYFTPKPVLDSTIDYFQPNKRNQLWLRLQTAGNVDHVGLGT |     |     |     |     |     |     |     |     |     |
| KY806003 762454 PCV-2b  | ..... ..... ..... ..... ..... ..... ..... ..... ..... .....                                          |     |     |     |     |     |     |     |     |     |
| 79971                   | ..... ..... ..... ..... ..... ..... ..... ..... ..... .....                                          |     |     |     |     |     |     |     |     |     |
|                         | 210                                                                                                  | 220 | 230 |     |     |     |     |     |     |     |
| EU450638 C6 PCV-2b      | ..... ..... ..... ..... ..... ..... ..... ..... ..... .....                                          |     |     |     |     |     |     |     |     |     |
| KP768478 3196-LE PCV-2b | AFENSIYDQEYNIRVTMYVQFREPNLKDPPLNE*                                                                   |     |     |     |     |     |     |     |     |     |
| KY806003 762454 PCV-2b  | ..... ..... ..... ..... ..... ..... ..... ..... ..... .....                                          |     |     |     |     |     |     |     |     |     |
| 79971                   | ..... ..... ..... ..... ..... ..... ..... ..... ..... .....                                          |     |     |     |     |     |     |     |     |     |

**Figure S2a.** Amino acid alignment of the sample 79971 with the PCV2b reference strains [31].

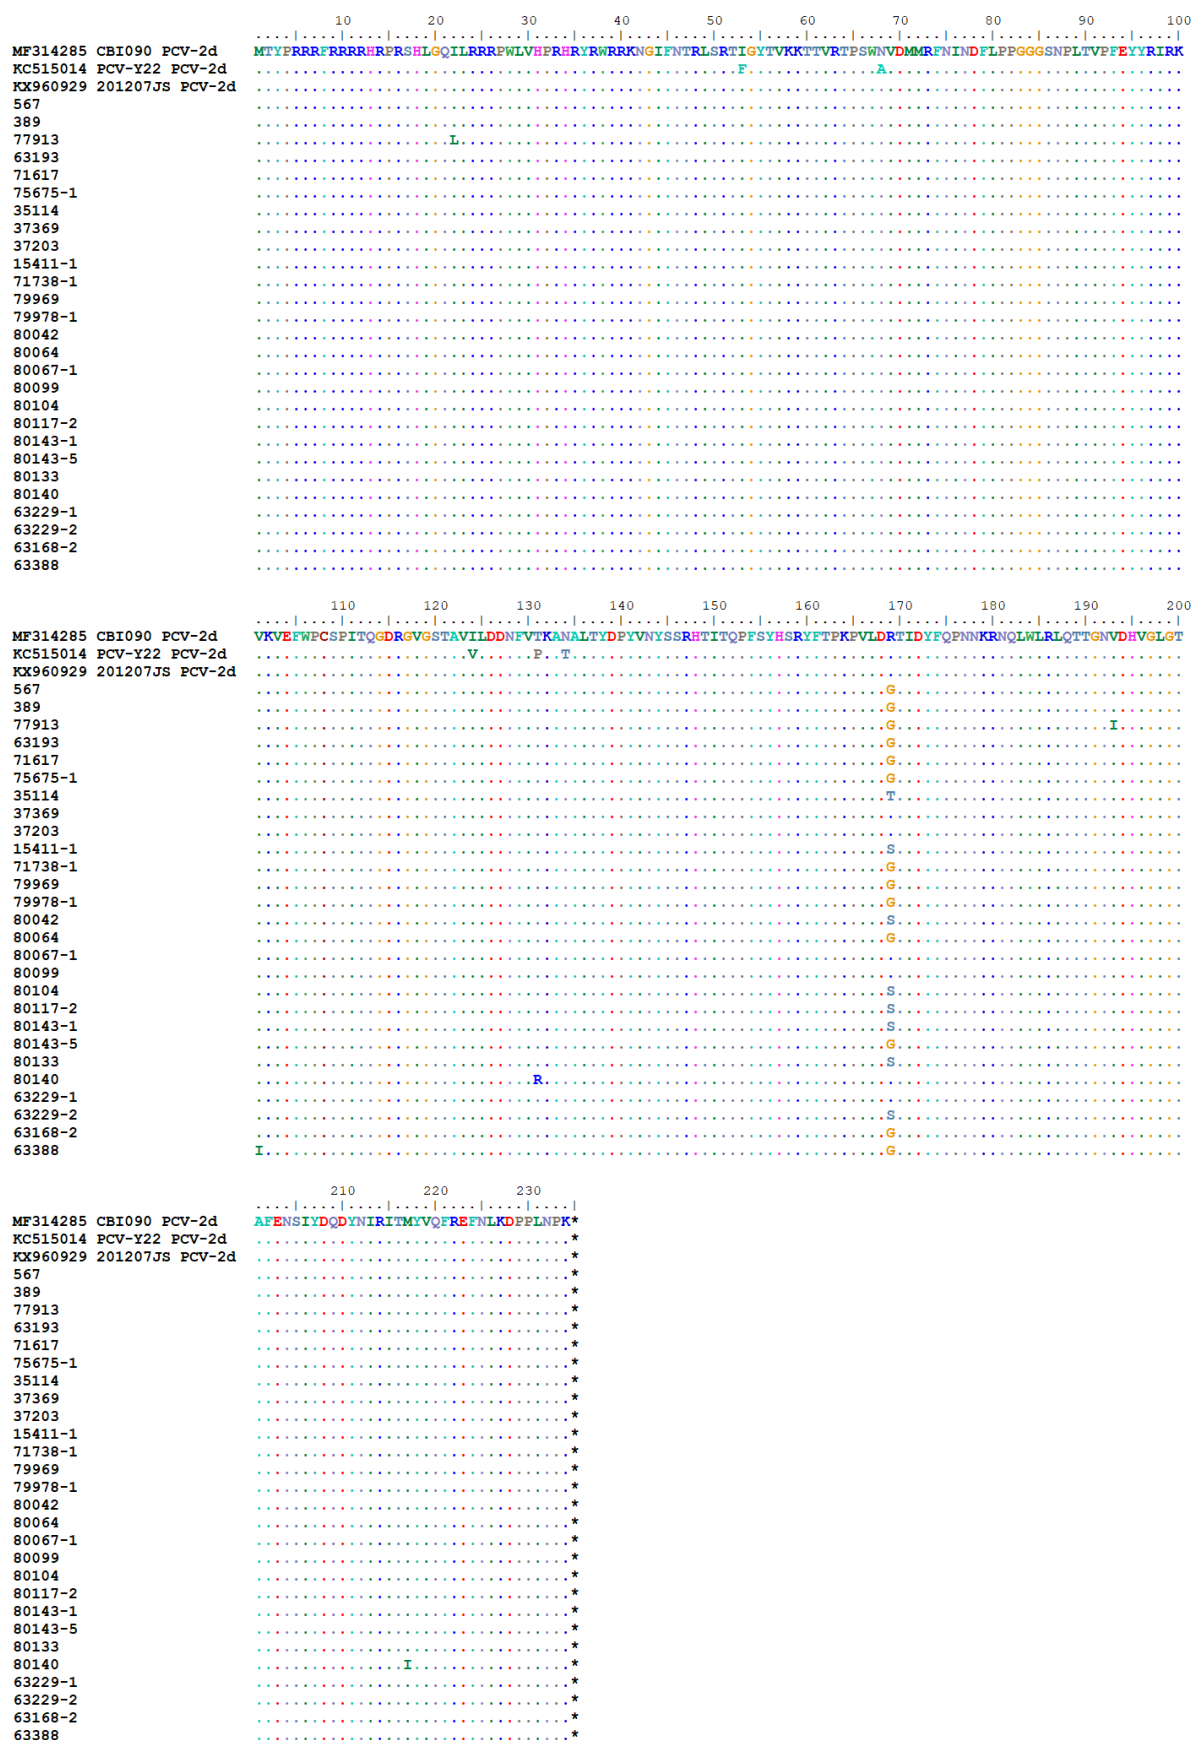

**Figure S2b.** Amino acid alignment of the different haplotypes evidenced in this study with PCV2d reference strains [31].
