# Supplementary material for: Evidence of Porcine Circovirus Type 2 (PCV2) Genetic Shift from PCV2b to PCV2d Genotype in Sardinia, Italy
Source: Viruses. 2023 Oct 26;15(11):2157. doi: 10.3390/v15112157 (PMC10674684; doi:10.3390/v15112157)
Supplement: Supplementary file 1 [file viruses-15-02157-s001.zip]

Archive with 4 entries (4 files):
- viruses-2632091-supplementary/Figure S1.pptx
- viruses-2632091-supplementary/Figure S2.pdf
- viruses-2632091-supplementary/Table S1.pdf
- viruses-2632091-supplementary/Table S2.pdf
